# Supplementary material
Source: Frontiers journal article supplement (https://www.frontiersin.org/articles/278858)
Supplement: Image_1.PDF [file Image_1.PDF]

Subject

Date :

Modality

Evaluate each statement by assigning a score on the scale, indicating to what extent you agree with them.

|    |                                                                                           | Strongly disagree |   |   |   | Strongly agree |
|----|-------------------------------------------------------------------------------------------|-------------------|---|---|---|----------------|
|    |                                                                                           | 1                 | 2 | 3 | 4 | 5              |
| 1  | I think that I would like to use the system frequently                                    |                   |   |   |   |                |
| 2  | I found the system unnecessarily complex                                                  |                   |   |   |   |                |
| 3  | I thought the system was easy to use                                                      |                   |   |   |   |                |
| 4  | I think that I would need the support of a technical person to be able to use this system |                   |   |   |   |                |
| 5  | I found the various functions in this system were well integrated                         |                   |   |   |   |                |
| 6  | I thought there was too much inconsistency in this system                                 |                   |   |   |   |                |
| 7  | I would imagine that most people would learn to use this system very quickly              |                   |   |   |   |                |
| 8  | I found the system very awkward to use                                                    |                   |   |   |   |                |
| 9  | I felt very confident using the system                                                    |                   |   |   |   |                |
| 10 | I needed to learn a lot of things before I could get going with this system               |                   |   |   |   |                |

|                   |  |  |  |  |                |  |  |  |  |
|-------------------|--|--|--|--|----------------|--|--|--|--|
| Strongly disagree |  |  |  |  | Strongly agree |  |  |  |  |
| 1                 |  |  |  |  | 2              |  |  |  |  |
| 3                 |  |  |  |  | 4              |  |  |  |  |
| 5                 |  |  |  |  |                |  |  |  |  |

|    |                                                                                                         |  |  |  |  |  |
|----|---------------------------------------------------------------------------------------------------------|--|--|--|--|--|
| 11 | I thought the robot's movements were consistent with my intentions, compliant with what I wanted to do. |  |  |  |  |  |
| 12 | I thought the system is annoying, frustrating when using it                                             |  |  |  |  |  |
| 13 | I found the robot's movements weird, unnatural, not human-like                                          |  |  |  |  |  |
| 14 | I thought the robot's movements happened in right time compared to my intentions                        |  |  |  |  |  |
| 15 | I found the robot's movements jerky, unstable, clumsy                                                   |  |  |  |  |  |
| 16 | I found this system tiresome to use                                                                     |  |  |  |  |  |

|    |                                                                                         |
|----|-----------------------------------------------------------------------------------------|
| 17 | Do you have comments or observations regarding the experiment you just participated in? |
|    |                                                                                         |
