# Supplementary material
Source: Frontiers journal article supplement (https://www.frontiersin.org/articles/278858)
Supplement: Image_2.PDF [file Image_2.PDF]

Sujet

Date :

Modalité

Évaluez chacune de ces affirmations en indiquant à l'aide de l'échelle à quel point vous êtes en accord avec elles.

|    |                                                                                                            | Pas du tout d'accord |   |   |   |   | Tout à fait d'accord |  |
|----|------------------------------------------------------------------------------------------------------------|----------------------|---|---|---|---|----------------------|--|
|    |                                                                                                            | 1                    | 2 | 3 | 4 | 5 |                      |  |
| 1  | Je pense que j'aimerais utiliser ce système fréquemment pour piloter un robot                              |                      |   |   |   |   |                      |  |
| 2  | J'ai trouvé le système inutilement complexe                                                                |                      |   |   |   |   |                      |  |
| 3  | J'ai trouvé le système facile à utiliser                                                                   |                      |   |   |   |   |                      |  |
| 4  | Je pense que j'aurais besoin de l'aide d'une personne expérimentée pour être capable d'utiliser ce système |                      |   |   |   |   |                      |  |
| 5  | J'ai trouvé la fonction du système robotique bien intégrée dans le dispositif                              |                      |   |   |   |   |                      |  |
| 6  | J'ai trouvé qu'il y avait trop d'incohérences dans ce système                                              |                      |   |   |   |   |                      |  |
| 7  | J'imagine que la plupart des personnes apprendraient vite à se servir de ce système                        |                      |   |   |   |   |                      |  |
| 8  | J'ai trouvé que le système était peu maniable à utiliser                                                   |                      |   |   |   |   |                      |  |
| 9  | Je me sens en confiance lors de l'utilisation de ce système                                                |                      |   |   |   |   |                      |  |
| 10 | J'ai eu besoin d'apprendre beaucoup de choses avant d'utiliser le système                                  |                      |   |   |   |   |                      |  |

|    |                                                                                                           | <div> <div>Pas du tout d'accord</div> <div>Tout à fait d'accord</div> </div> |   |   |   |   |
|----|-----------------------------------------------------------------------------------------------------------|------------------------------------------------------------------------------|---|---|---|---|
|    |                                                                                                           | 1                                                                            | 2 | 3 | 4 | 5 |
| 11 | J'ai trouvé les mouvements du robot cohérents avec mes intentions, en accord avec ce que je voulais faire |                                                                              |   |   |   |   |
| 12 | J'ai trouvé ce système contrariant, frustrant dans son utilisation                                        |                                                                              |   |   |   |   |
| 13 | J'ai trouvé les mouvements du robot étranges, non naturels, peu humains                                   |                                                                              |   |   |   |   |
| 14 | J'ai trouvé que les mouvements du robot avaient lieu au bon moment, à temps, par rapport à mes intentions |                                                                              |   |   |   |   |
| 15 | J'ai trouvé les mouvements du robot saccadés, instables, maladroits                                       |                                                                              |   |   |   |   |
| 16 | J'ai trouvé ce système fatigant à utiliser                                                                |                                                                              |   |   |   |   |

|    |                                                                                                                   |
|----|-------------------------------------------------------------------------------------------------------------------|
| 17 | <p>Avez vous des remarques, des observations concernant l'expérience que vous venez de réaliser ?</p> <div></div> |
|----|-------------------------------------------------------------------------------------------------------------------|
